# Supplementary material
Source: PubMed Central journal article supplement (PMC2997370)
Supplement: mmc1.pdf [file mmc1.pdf]

The American Journal of Human Genetics, Volume 87

**Supplemental Data**

**Targeted Next-Generation Sequencing of a 12.5 Mb**

**Homozygous Region Reveals *ANO10* Mutations**

**in Patients with Autosomal-Recessive Cerebellar Ataxia**

Sascha Vermeer, Alexander Hoischen, Rowdy PP Meijer, Christian Gilissen, Kornelia Neveling, Nienke Wieskamp, Arjan de Brouwer, Michel Koenig, Mathieu Anheim, Mirna Assoum, Nathalie Drouot, Slobodanka Todorovic, Vedrana Milic-Rasic, Hanns Lochmüller, Giovanni Stevanin, Cyril Goizet, Albert David, Alexandra Durr, Alexis Brice, Berry Kremer, Bart P.C. van de Warrenburg, Mascha M.V.A.P. Schijvenaars, Angélien Heister, Michael Kwint, Peer Arts, Jenny van der Wijst, Joris Veltman, Erik-Jan Kamsteeg, Hans Scheffer, and Nine Knoers

**Figure S1. Magnetic Resonance Imaging of One of the Affected Patients Displaying Marked Diffuse Cerebellar Atrophy on Both Saggital (Upper Picture) and Axial (Lower Picture) Images**

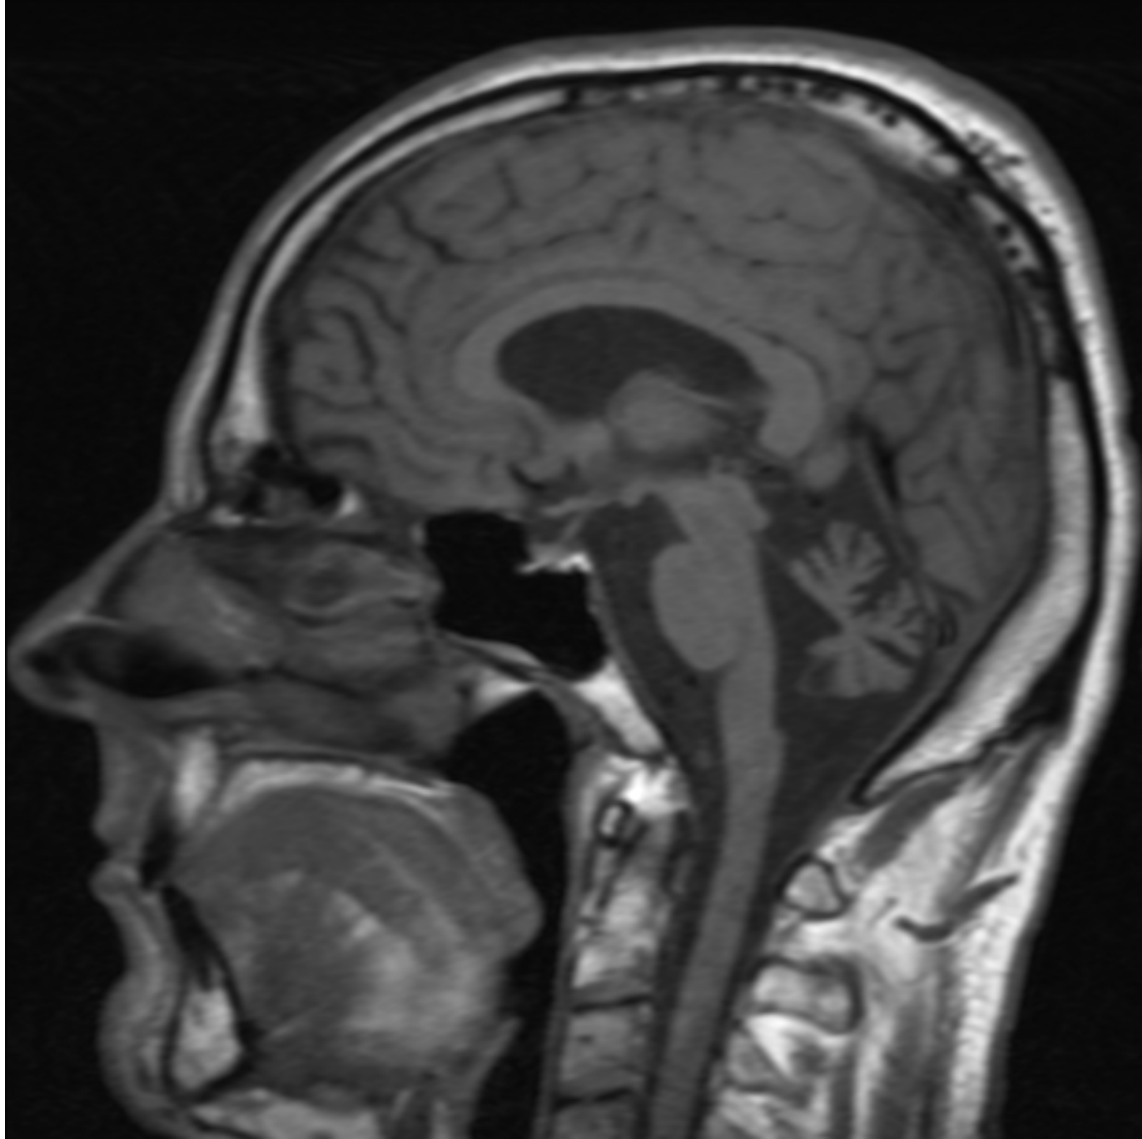

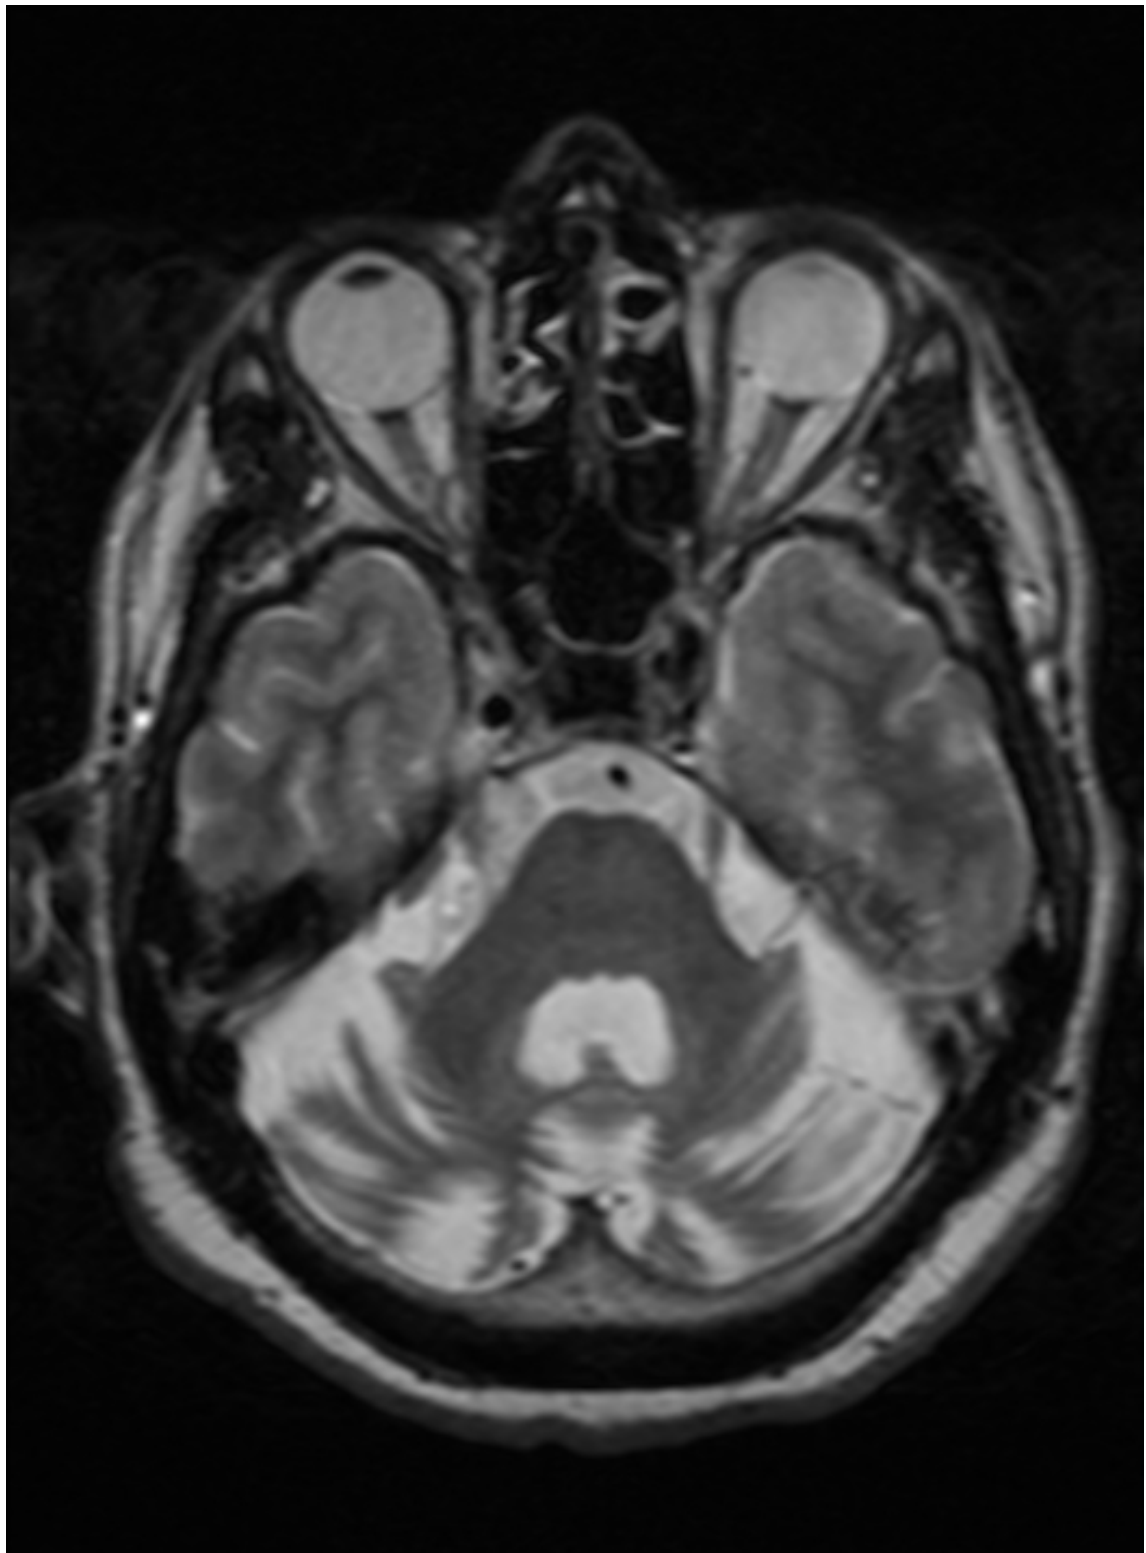

**Table S1. Targeted Regions of the Array Analysis**

1a. Targeted regions.

1b. Base pairs targeted.

1c. Total base pairs targeted after probe selection

**Table S1a**

| Chromosome | start       | end         | size       |
|------------|-------------|-------------|------------|
| Chr.1      | 77,105,773  | 78,116,669  | 1,010,896  |
| Chr.1      | 91,918,489  | 93,199,672  | 1,281,183  |
| Chr.2      | 140,705,465 | 142,605,740 | 1,900,275  |
| Chr.3      | 17,173,658  | 17,869,885  | 696,227    |
| Chr.3      | 32,123,105  | 33,009,854  | 886,749    |
| Chr.3      | 34,355,326  | 44,599,977  | 10,244,651 |
| Chr.3      | 78,729,077  | 80,456,380  | 1,727,303  |
| Chr.3      | 126,284,169 | 127,489,262 | 1,205,093  |
| Chr.3      | 131,245,012 | 131,313,041 | 68,029     |
| Chr.4      | 147,394,586 | 147,692,007 | 297,421    |
| Chr.14     | 59,132,446  | 59,624,078  | 491,632    |
| Sum        |             |             | 19,809,459 |

**Table S1b**

|                   |
|-------------------|
| Total bp targeted |
| 1905376           |

**Table S1c**

|                |
|----------------|
| Total bp tiled |
| 2178492        |

**Table S2. General Statistics of the Sequencing Run**

| <b>Coverage statistics</b>                |             | <b>Variant statistics</b>           |      |
|-------------------------------------------|-------------|-------------------------------------|------|
| Total number of mapped bases              | 109,790,683 | Number of variants detected         | 3917 |
| % bases mapped to or near (500bp) targets | 93.50%      | Known SNPs (dbSNP130)               | 3521 |
| Average coverage of the targets           | 32.28x      | Novel variants of those:            | 396  |
| % targets covered at least 1x             | 99.01%      | Splice site (SS) or coding variants | 10   |
| % targets covered at least 5x             | 98.48%      | Non synonymous (NS) or SS           | 8    |
| % targets covered at least 10x            | 95.80%      | Homozygous SS or NS                 | 4    |
| % targets covered at least 15x            | 89.77%      |                                     |      |
| % targets covered at least 20x            | 79.66%      |                                     |      |

Left side: statistics on the sequence coverage. Right side: statistics on the detected variants by the Roche 454 software. Known SNPs are only variants with the exact nucleotide change as described in dbSNP

**Table S3. Overview of Variants after Initial Prioritization**

| <b>Chr</b> | <b>Position</b> | <b>Ref</b> | <b>Var</b> | <b>%<br/>Var</b> | <b>Gene</b> | <b>Gene Id</b> | <b>Ref<br/>AA</b> | <b>Mut<br/>AA</b> | <b>PhyloP</b> | <b>Grantham</b> |
|------------|-----------------|------------|------------|------------------|-------------|----------------|-------------------|-------------------|---------------|-----------------|
| chr2       | 1.41E+08        | A          | -          | 89               | LRP1B       | NM_018557      | SS                |                   | 0.40          | 0               |
| chr3       | 36754018        | C          | G          | 98               | DCLK3       | NM_033403      | R                 | S                 | 0.24          | 0               |
| chr3       | 43571913        | A          | C          | 94               | ANO10       | NM_018075      | L                 | R                 | 5.26          | 145             |
| chr3       | 43718918        | G          | T          | 100              | ABHD5       | NM_016006      | R                 | L                 | 2.65          | 102             |

Columns are from left to right: chromosome (Chr), position of the variant (Position), reference allele on the plus strand (Ref), variant allele on the plus strand (Var), percentage of reads with the variant allele (% Var), gene name in which the variant is located (Gene), RefSeq gene id (Gene Id), reference amino acid, where “SS” indicates a canonical splice site (Ref AA), variant amino acid (Mut AA), PhyloP log odds ratio for evolutionary conservation (PhyloP) (Pollard et al. 110-21) and Grantam score for the amino acid substitution (Grantham). The lightly shaded variant was reported in our internal variant database. The dark shading indicates the causative mutation.

**Table S4. Primers Used for Amplification and Sequence Analysis of Human ANO10**

| Exon | Forward (5' > 3')       | Reverse (5' > 3')       | Amplicon Length (bp) |
|------|-------------------------|-------------------------|----------------------|
| 1    | TACGATCGCCAGTGAGG       | GCTCTGTGGCTGCAAGG       | 340                  |
| 2    | TGCTTTTATCTTGGAAGCCAG   | GGGAGGCTGAGCATAACAGTG   | 327                  |
| 3    | AAAGAAGTGCATCCCTAATG    | AAAAAGTTTGCTGATCCCTGA   | 457                  |
| 4    | CATACTGCTTCTGCTCATTGG   | ATTTTCATGTACAATGTTAGGGC | 744                  |
| 5    | TGAAGCGTATCATGCACAATC   | ATATCTGCCAAGGGAGCTG     | 275                  |
| 6-1  | AGGGTTGAATGATCCCCAC     | AAATGCGCAACTGTCTCTTG    | 459                  |
| 6-2  | AACATGACCTACAGGTGGGG    | TGTGAATCCCATGATCTAGGC   | 435                  |
| 7    | GACTGAGGCTCTGATGTTGG    | TCAATCCTTGCTATTTGCAC    | 304                  |
| 8    | AGGCTGGGAGCTGTAGACTG    | GCATAATACACAATGCCATTCC  | 399                  |
| 9    | GAAACACCATTCTAACACCTAGC | AGCAGTGCTTCAATGCAAAG    | 569                  |
| 10   | AGAGGCCACAGCTTTGATTAG   | TTCCCTGTCATAACACCTCG    | 341                  |
| 11   | AGGATGAGGAAATATGGAAGC   | TTGCTCAATTGTCAGTCATGG   | 290                  |
| 12   | GGCCTGCTTGGTCTTTGATAC   | TCCTGAACTGGAGTCCTCTG    | 404                  |
| 13-1 | GCTTCCACAGAGAGCAGAGG    | ACTGCTATGAGGGGAACGTG    | 490                  |
| 13-2 | CCTTCTCAGTTTCGCAGTGG    | ATCTCACCGCTCCACCTTC     | 499                  |
